# Supplementary material
Source: publisher figshare collection journal article supplement (https://tandf.figshare.com/ndownloader/files/16783709)
Supplement: Supplementary file 1 [file 16783709]

**Table S1:**

| **Target gene** | **Primer sequence** | **Product size (bp)** |
| --- | --- | --- |
| **16s rRNA for helicobacter specie identification** | **F** 5′-TGG TGT AGG GGT AAA ATC C-3’  **R** 5′-GCC GTG CAG CAC CTG TTT C-3 | **448bp** |
| **Primers for CdtB for the detection *H.pullorum*** | **F** 5’-GTC TTT TGA GTG GAT TGG CT-3’  **R** 5’-CAC TCC GGG TGC TTG AT-3’ | **148bp** |
| **Primers for Hcp for the detection of T6SS** | **F** 5’- AAG GTG CAA CTC AAG GGC T” -3’  **R** 5’- TGG AAC AAG CGG AAG CGA T”- 3’ | **496bp** |

| Sr.No  **Table S2: List of liver and caecum isolates from Broiler chicken** | Sample ID  Liver/ caecum sample | Culture positive or negative | Screening for Genus 16srRNA | CdtB Screening | T6SS Hcp Screening |
| --- | --- | --- | --- | --- | --- |
| 1 | KH1C | + | + | + | + |
| 2 | KH2C | + | + | + | + |
| 3 | KH3C | + | + | + | + |
| 4 | KH4C | + | + | + |  |
| 5 | KH5C | + | + | + |  |
| 6 | KH6C | + | + | + |  |
| 7 | KH7C | + | + |  |  |
| 8 | KH8C | + | + |  |  |
| 9 | KH8L | + | + |  |  |
| 10 | KH9C | - |  |  |  |
| 11 | KH9L | - |  |  |  |
| 12 | KH10C | + | + | + |  |
| 13 | KH10L | + | + | + | + |
| 14 | KH11C | + |  |  |  |
| 15 | KH11L | + |  |  |  |
| 16 | KH12C | + | + | + | + |
| 17 | KH12L | + |  |  |  |
| 18 | KH13C | + |  |  |  |
| 19 | KH13L | + |  |  |  |
| 20 | KH14C | + |  |  |  |
| 21 | KH14L | + | + | + | + |
| 22 | KH15C | + |  |  |  |
| 23  23 | KH15L | + |  |  |  |
| 24 | KH16C | + |  |  |  |
| 25 | KH16L | + | + | + |  |
| 26 | KH17C | + |  |  |  |
| 27 | KH17L | + | + |  |  |
| 28 | KH18C | + |  |  |  |
| 29 | KH18L | + |  |  |  |
| 30 | KH19C | + | + | + |  |
| 31 | KH19L | + | + |  |  |
| 32 | KH20C | + | + | + |  |
| 33 | KH20L | + | + | + |  |
| 34 | KH21C | + | + | + | + |
| 35 | KH21L | + | + | + |  |
| 36 | KH22C | + | + |  |  |
| 37 | KH22L | + |  |  |  |
| 38 | KH23C | + | + | + |  |
| 39 | KH23L | + | + |  |  |
| 40 | TH1C | + |  |  |  |
| 41 | TH1L | + |  |  |  |
| 42 | TH2C | + |  |  |  |
| 43 | TH2L | + |  |  |  |
| 44 | TH3C | + | + |  |  |
| 45 | TH3L | + | + | + |  |
| 46 | TH4C | + |  |  |  |
| 47 | TH4L | + | + | + | + |
| 48 | TH5C | + | + |  |  |
| 49 | TH5L | + |  |  |  |
| 50 | TH6C | - |  |  |  |
| 51 | TH6L | - |  |  |  |
| 52 | TH7C | + | + | + |  |
| 53 | TH7L | + |  |  |  |
| 54 | TH8C | + | + |  |  |
| 55 | TH8L | + | + | + |  |
| 56 | TH9C | + | + | + |  |
| 57 | TH9L | + |  |  |  |
| 58 | TH10C | + |  |  |  |
| 59 | TH10L | + | + |  |  |
| 60 | TH11C | + |  |  |  |
| 61 | TH11L | + | + |  |  |
| 62 | TH12C | + |  |  |  |
| 63 | TH12L | + |  |  |  |
| 64 | TH13C | + | + |  |  |
| 65 | TH13L | + |  |  |  |
| 66 | TH14C | + |  |  |  |
| 67 | TH14L | + |  |  |  |
| 68 | TH15C | + | + | + |  |
| 69 | TH15L | + |  |  |  |
| 70 | TH16C | + |  |  |  |
| 71 | TH16L | + |  |  |  |
| 72 | TH17C | + |  |  |  |
| 73 | TH17L | + | + |  |  |
| 74 | TH18C | + |  |  |  |
| 75 | TH18L | + |  |  |  |
| 76 | TH19C | + |  |  |  |
| 77 | TH19L | + | + |  |  |
| 78 | TH20C | + |  |  |  |
| 79 | TH20L | + |  |  |  |
| 80 | TH21C | + |  |  |  |
| 81 | TH21L | + |  |  |  |
| 82 | TH22C | + | + | + |  |
| 83 | TH22L | + |  |  |  |
| 84 | TH23C | + |  |  |  |
| 85 | TH23L | + |  |  |  |
| 86 | TH24C | + |  |  |  |
| 87 | TH24L | + |  |  |  |
| 88 | TH25C | + |  |  |  |
| 89 | TH25L | + |  |  |  |
| 90 | TH26C | + |  |  |  |
| 91 | TH26L | + |  |  |  |
| 92 | TH27C | + |  |  |  |
| 93 | TH27L | + |  |  |  |
| 94 | TH28C | + | + | + |  |
| 95 | TH28L | + |  |  |  |
| 96 | TH29C | + |  |  |  |
| 97 | TH29C | + |  |  |  |
| 98 | TH30C | + |  |  |  |
| 99 | TH30L | + |  |  |  |
| 100 | TH31C | + | + | + | + |
| 101 | TH31L | + |  |  |  |
| 102 | TH32C | + | + | + |  |
| 103 | TH32L | + |  |  |  |
| 104 | TH33C | + | + | + |  |
| 105 | TH33L | + |  |  |  |
| 106 | TH34C | + |  |  |  |
| 107 | TH34L | + |  |  |  |
| 108 | TH35C | + | + | + |  |
| 109 | TH35L | + |  |  |  |
| 110 | TH36C | + | + | + |  |
| 111 | TH36L | + | + |  |  |
| 112 | TH37C | + | + | + |  |
| 113 | TH37L | + | + | + |  |
| 114 | TH38C | + |  |  |  |
| 115 | TH38L | + |  |  |  |
| 116 | TH39C | + | + | + | + |
| 117 | TH39L | + | + | + |  |
| 118 | TH40C | + |  |  |  |
| 119 | TH40L | + | + | + | + |
| 120 | GH1C | - |  |  |  |
| 121 | GH1L | + |  |  |  |
| 122 | GH2C | + |  |  |  |
| 123 | GH2L | + |  |  |  |
| 124 | GH3C | + |  |  |  |
| 125 | GH3L | + | + | + |  |
| 126 | GH4C | + |  |  |  |
| 127 | GH4L | + |  |  |  |
| 128 | GH5C | + |  |  |  |
| 129 | GH5L | + |  |  |  |
| 130 | GH6C | + |  |  |  |
| 131 | GH6L | + |  |  |  |
| 132 | GH7C | + |  |  |  |
| 133 | GH7L | + |  |  |  |
| 134 | GH8C | + |  |  |  |
| 135 | GH8L | + | + | + |  |
| 136 | GH9C | + |  |  |  |
| 137 | GH9L | + |  |  |  |
| 138 | GH10C | + |  |  |  |
| 139 | GH10L | + |  |  |  |
| 140 | GH11C | + |  |  |  |
| 141 | GH11L | + |  |  |  |
| 142 | GH12C | + |  |  |  |
| 143 | GH12L | + |  |  |  |
| 144 | GH13C | + |  |  |  |
| 145 | GH13L | + |  |  |  |
| 146 | GH14C | + |  |  |  |
| 147 | GH14L | + |  |  |  |
| 148 | GH15C | + |  |  |  |
| 149 | GH15L | + |  |  |  |
| 150 | GH16C | + |  |  |  |
| 151 | GH16L | + |  |  |  |
| 152 | GH17C | + |  |  |  |
| 153 | GH17L | + |  |  |  |
| 154 | GH18C | + |  |  |  |
| 155 | GH18L | + | + |  |  |
| 156 | GH19C | + |  |  |  |
